# Supplementary material for: Mediterranean nekton traits: distribution, relationships and significance for marine ecology monitoring and management
Source: PeerJ journal article supplement (doi:10.7717/peerj.8494), 2020-02-14

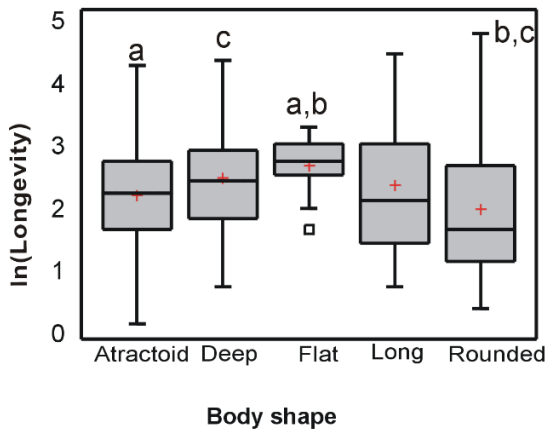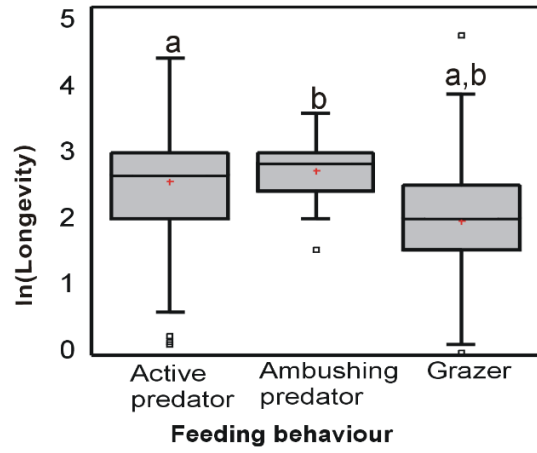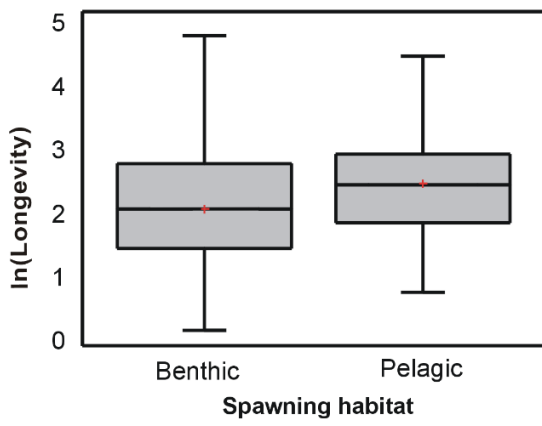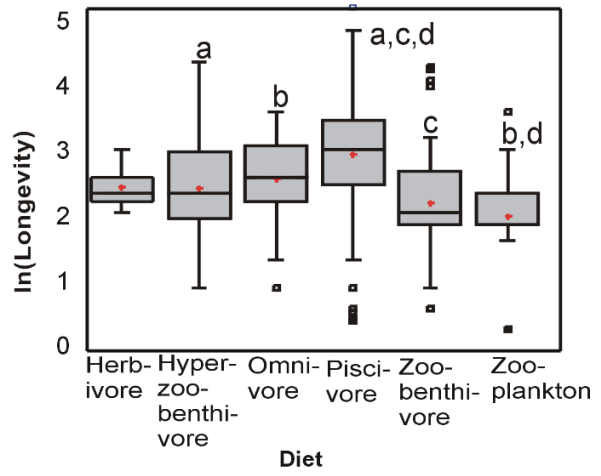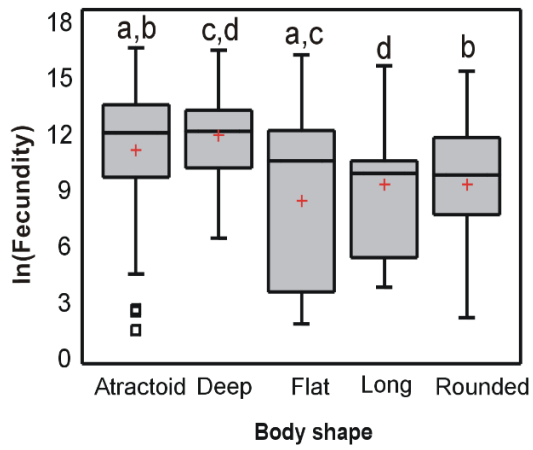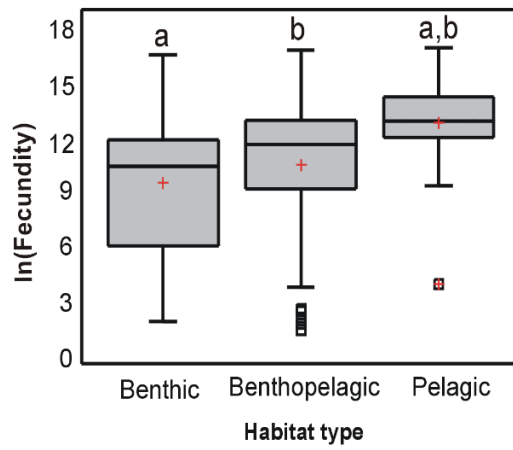

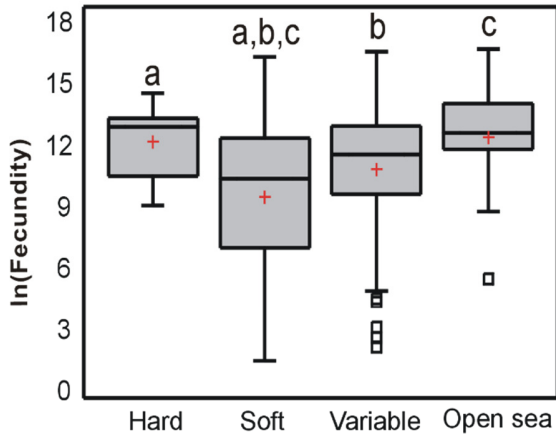

Seabed morphology

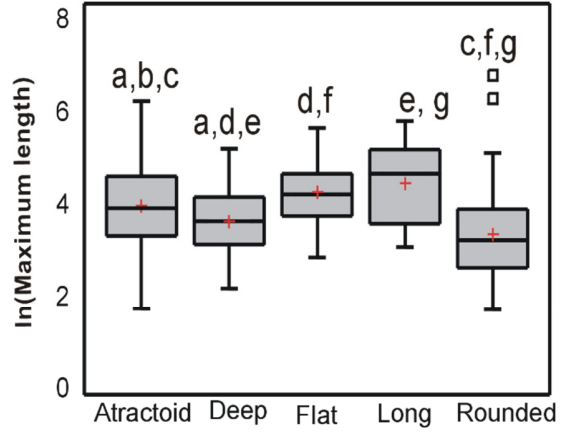

Body shape

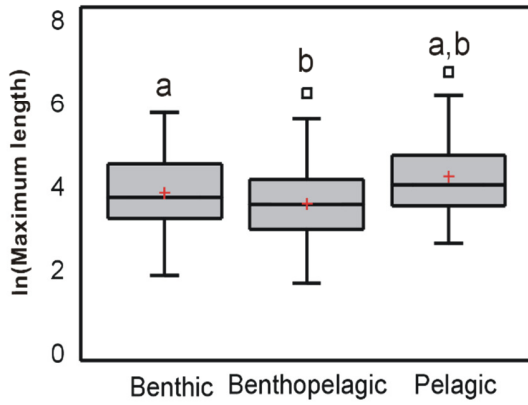

Habitat type

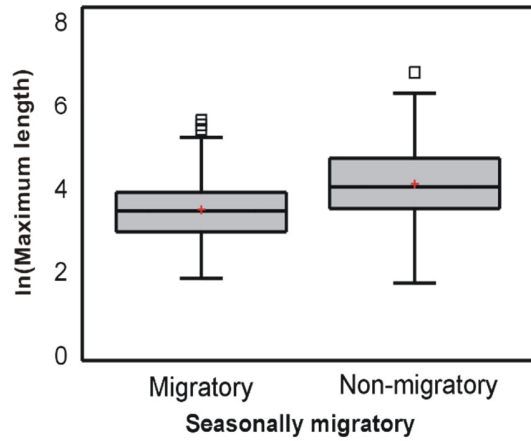

Seasonally migratory

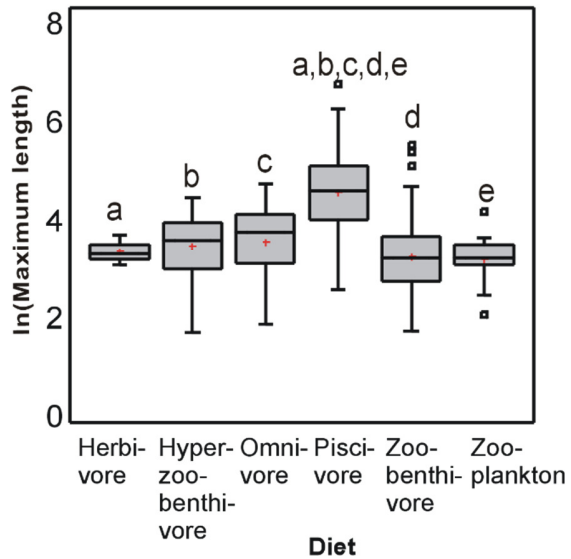

Diet

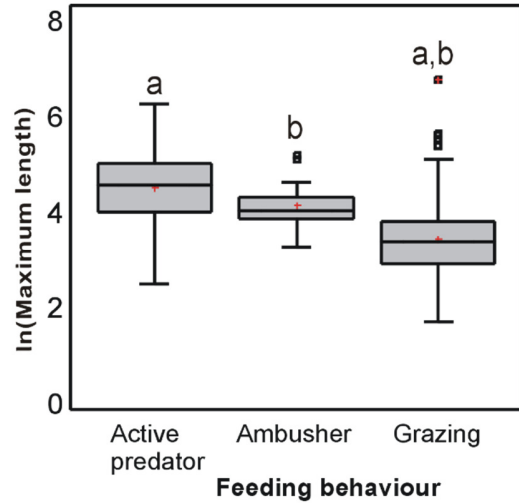

Feeding behaviour

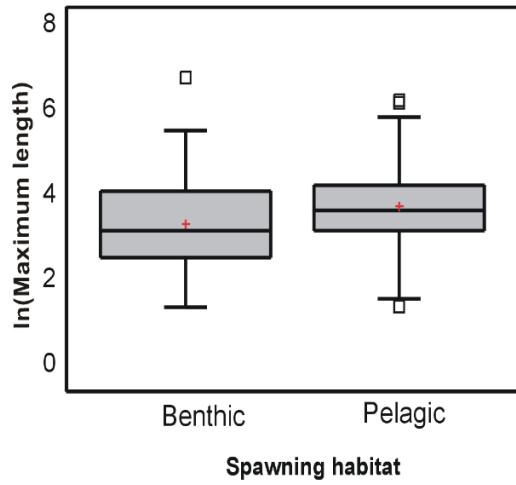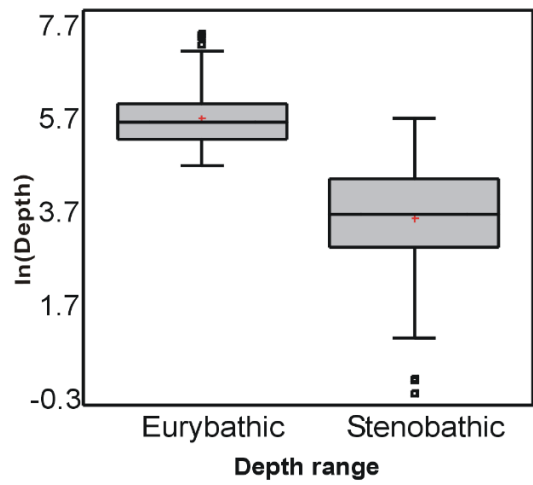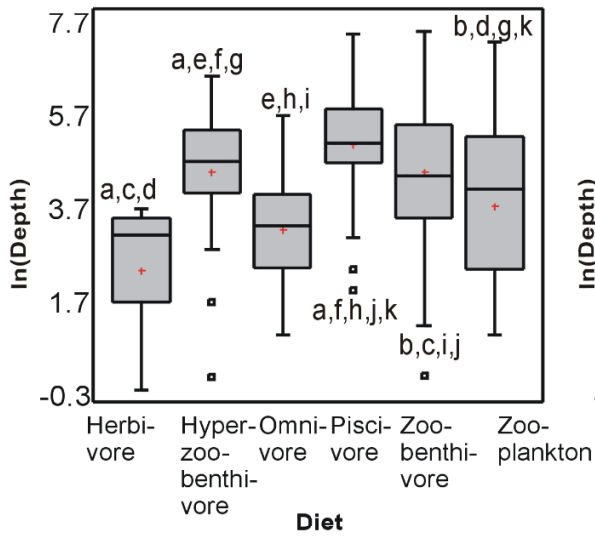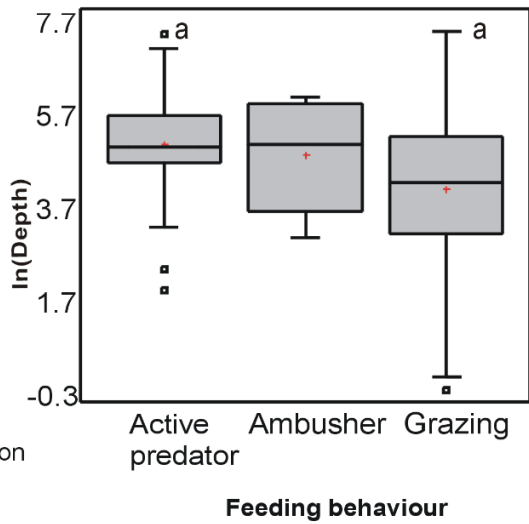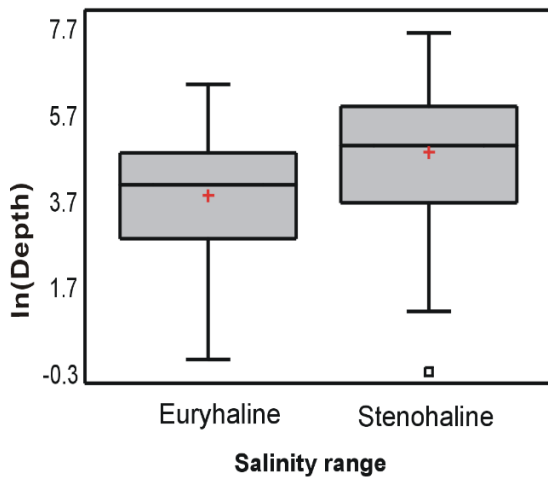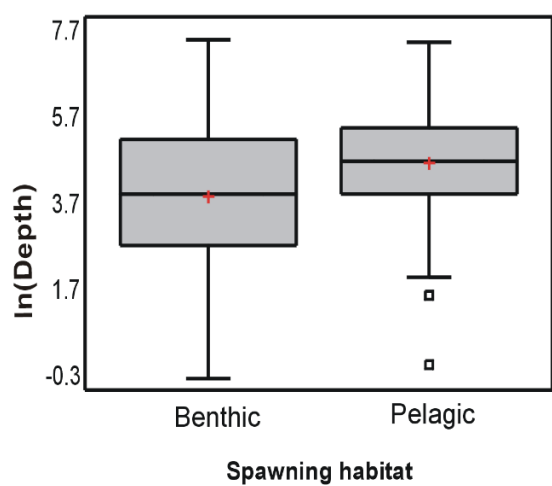

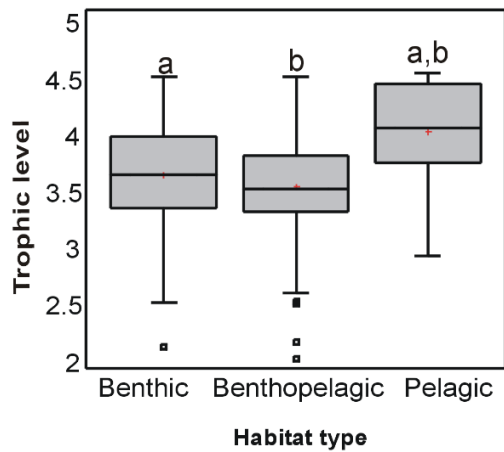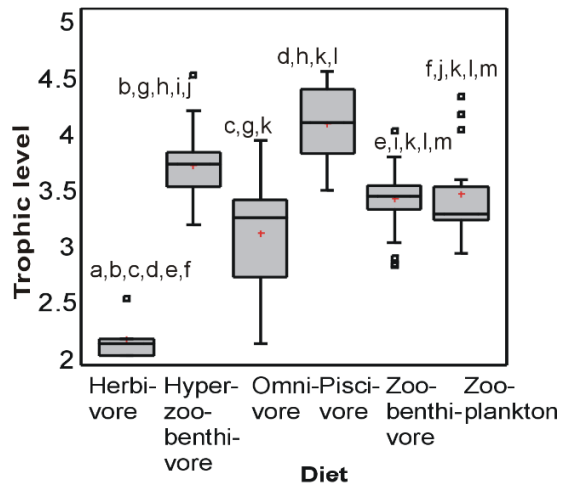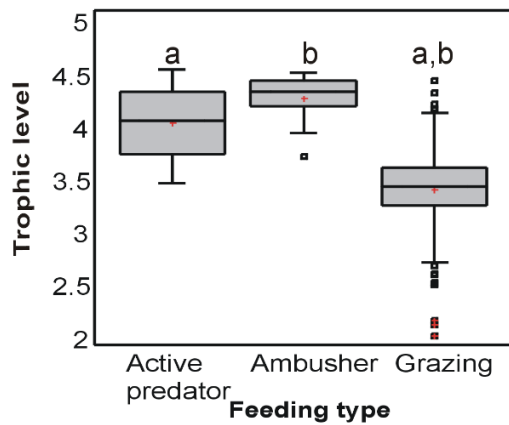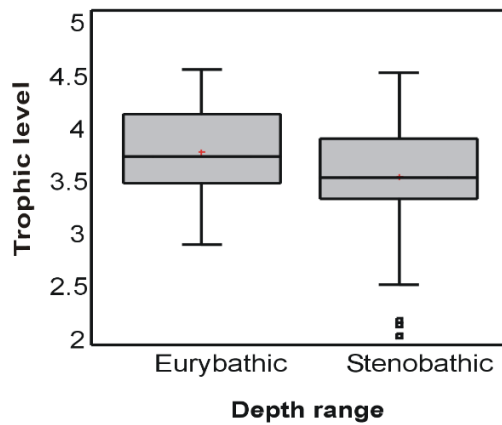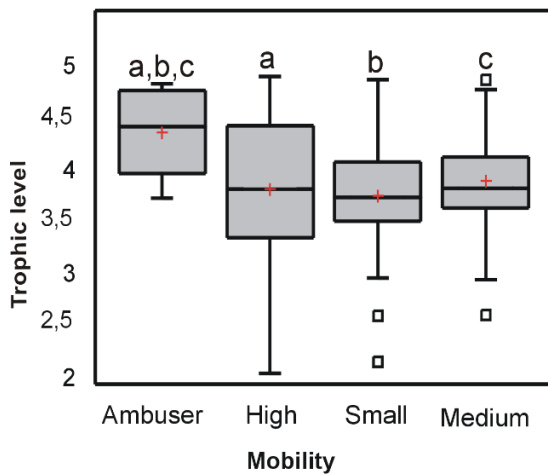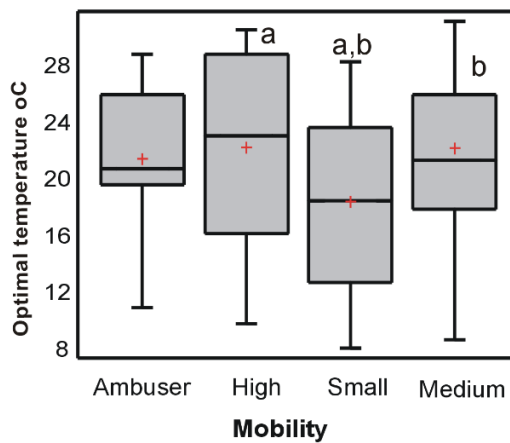

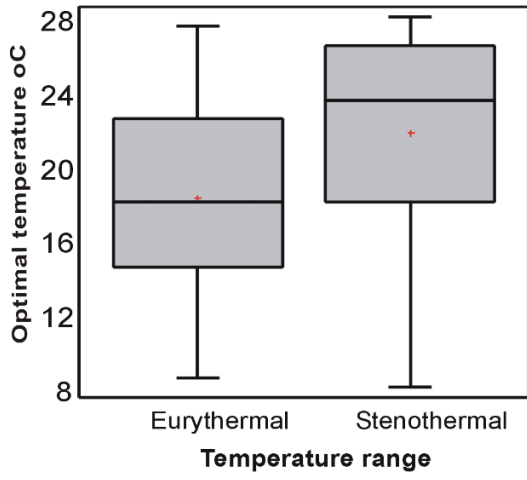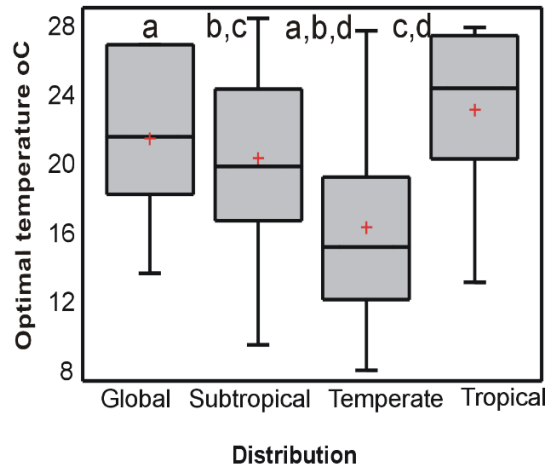

Supplement: tzanatos_Suppl_Figure_S1.pdf [file tzanatos_Suppl_Figure_S1.pdf]
