# Supplementary material for: Mediterranean nekton traits: distribution, relationships and significance for marine ecology monitoring and management
Source: PeerJ journal article supplement (doi:10.7717/peerj.8494), 2020-02-14
Supplement: tzanatos_Suppl_Table_S1.pdf [file tzanatos_Suppl_Table_S1.pdf]

| #  | Trait                | Definition                                                                                                                                                                                                                                                                                                                                            |
|----|----------------------|-------------------------------------------------------------------------------------------------------------------------------------------------------------------------------------------------------------------------------------------------------------------------------------------------------------------------------------------------------|
| 1  | Longevity            | Maximum lifespan in years (largest ever recorded for this species)                                                                                                                                                                                                                                                                                    |
| 2  | Age at maturity (%)  | Age at maturity as a percentage of longevity (age at maturity in years divided by longevity in years)                                                                                                                                                                                                                                                 |
| 3  | Fecundity            | Number of eggs or offspring produced per year by a female                                                                                                                                                                                                                                                                                             |
| 4  | Hermaphroditism      | Existence (or prevalence) of gonochory or hermaphroditism in this species                                                                                                                                                                                                                                                                             |
| 5  | Maximum length       | Maximum length recorded (largest ever recorded for this species)                                                                                                                                                                                                                                                                                      |
| 6  | Body shape           | Prevailing outline of body shape. Categories indicating varying dimension(s) in comparison to "atractoid" (flat: length and width dominant, long: length dominant, deep: depth dominant, rounded: width and depth dominant)                                                                                                                           |
| 7  | Optimal depth        | Depth range of the species                                                                                                                                                                                                                                                                                                                            |
| 8  | Optimal temperature  | Temperature range preference of the species                                                                                                                                                                                                                                                                                                           |
| 9  | Habitat type         | Preference for the benthic or the pelagic habitat or benthopelagic mode of habitat use                                                                                                                                                                                                                                                                |
| 10 | Distribution         | Main geographic distribution of the species                                                                                                                                                                                                                                                                                                           |
| 11 | Seabed morphology    | Species affinity to specific morphological features of the habitat (soft: soft substrates like sand, silt, mud, hard: hard substrates like rock or biogenic reef, variable: heterogenous habitat or affinity to all seabed habitat types, water column: no affinity to the seabed)                                                                    |
| 12 | Spawning habitat     | Species preference for the benthic or pelagic habitat for spawning                                                                                                                                                                                                                                                                                    |
| 13 | Temperature range    | Existence of wide or small tolerance range for temperature values. Either as defined in the bibliography or, if bibliography provided minimum & maximum value, a difference of over 10o C was considered as eurythermal                                                                                                                               |
| 14 | Salinity range       | Existence of wide or small tolerance range for salinity values as defined from the bibliography or taking into account relevant terminology (e.g. a species occurring in marine and brackish waters was considered euryhaline)                                                                                                                        |
| 15 | Depth range          | Existence of wide or small tolerance range for depth. If the bibliography provided depth range (minimum & maximum) a difference over 200 m was considered eurybathic)                                                                                                                                                                                 |
| 16 | Seasonally migratory | Occurrence or not of seasonal migrations as an aspect of life cycle                                                                                                                                                                                                                                                                                   |
| 17 | Trophic level        | Weighted quantification of diet composition as a level above primary producers (primary producers defined as level 1, primary consumers defined as level 2 and so on)                                                                                                                                                                                 |
| 18 | Diet                 | Characterisation of dominant food objects of the species                                                                                                                                                                                                                                                                                              |
| 19 | Spawning period      | Dominant season of spawning                                                                                                                                                                                                                                                                                                                           |
| 20 | Feeding behaviour    | Movement pattern and behaviour regarding the approach and catch of prey items (grazer: eating sessile food items or food items with disproportionately lower mobility, active predator: predator catching food items after pursuit, ambushing predator: predator catching food items with abrupt movement)                                            |
| 21 | Sociability          | Tendency to occur (or not) in groups, size of groups and level of coordination (Schooling or shoaling) with other members of the group                                                                                                                                                                                                                |
| 22 | Exposure             | Level of exposure of individuals with regard to the occupied microhabitat (free: fully exposed within microhabitat, permanently cryptic: species occurring half-buried, camouflaged or in a nest, temporarily cryptic: species with close affinity to environments with vegetation or rocks, but rather motile in these environments and not cryptic) |
| 23 | Mobility             | Rate, pattern and permanence of movement                                                                                                                                                                                                                                                                                                              |
